# Supplementary material
Source: PubMed Central journal article supplement (PMC4294392)
Supplement: jcbfm2014162x1.pdf [file jcbfm2014162x1.pdf]

Supplementary Information

Supplementary Table 1. Primers sequences for mouse *Oct1*, *Oct2*, *Oct3*, *Mdr1a*, and *Gapdh*.

| Genes         |         | Primer sequence                 | References |
|---------------|---------|---------------------------------|------------|
| <i>mOct1</i>  | Forward | 5'-GTAAGCTCTGCCTCCTGGTG-3'      | 1          |
|               | Reverse | 5'-GCTGTCGTTCTCCTGTAGCC-3'      |            |
| <i>mOct2</i>  | Forward | 5'-TACCGGAGTCTCCAAGATGG-3'      | 1          |
|               | Reverse | 5'-GACCAAGTCCAGGAACGAAG-3'      |            |
| <i>mOct3</i>  | Forward | 5'-CAGATATGGCAGGCTCATCA-3'      | 1          |
|               | Reverse | 5'-GACTTGCTTCGTGATGCTGA-3'      |            |
| <i>mMdr1a</i> | Forward | 5'-GATCAACTCGCAAAAGCATCTG-3'    | 2          |
|               | Reverse | 5'-CCACTCCAGCTATCGCAATG-3'      |            |
| <i>mGapdh</i> | Forward | 5'-TGTGTCCGTCGTGGATCTGA-3'      | 3          |
|               | Reverse | 5'-CACCACCTTCTTGATGTCATCATAC-3' |            |

1. Lips KS, Wunsch J, Zarghooni S, Bschiepfer T, Schukowski K, Weidner W *et al.* Acetylcholine and molecular components of its synthesis and release machinery in the urothelium. *Eur Urol* 2007; **51**:1042-1153.
2. NM\_011076.2
3. Shioda N, Beppu H, Fukuda T, Li E, Kitajima I, Fukunaga K. Aberrant calcium/calmodulin-dependent protein kinase II (CaMKII) activity is associated with abnormal dendritic spine morphology in the ATRX mutant mouse brain. *J Neurosci* 2011; **31**:346-358

Supplementary Table 2. N-methyl-R-SAL or 1-benzyl-TIQ inhibit MPP<sup>+</sup> uptake by MDCK-hOCT1 and MDCK-hOCT2 cells.

|                           | K <sub>M</sub><br>μM  | V <sub>max</sub><br>pmol/mg/min | K<br>μL/mg/min | K <sub>i</sub> <sup>b</sup><br>μM |
|---------------------------|-----------------------|---------------------------------|----------------|-----------------------------------|
| <b>hOCT1</b>              |                       |                                 |                |                                   |
| MPP <sup>+</sup> only     | 7.3±1.9               | 1021.0±112.0                    | 3.9±0.2        |                                   |
| + N-methyl-R-SAL (0.1 mM) | 44.7±8.7              | 1131.3±195.5                    | 4.3±0.7        | 45.9                              |
| + 1-benzyl-TIQ (0.05 mM)  | 21.7±3.7              | 1053.8±115.6                    | 5.7±0.6        | 40.7                              |
| <b>hOCT2</b>              |                       |                                 |                |                                   |
| MPP <sup>+</sup> only     | 5.1±1.0               | 296.1±34.6                      | 2.5±0.3        |                                   |
| + N-methyl-R-SAL (0.1 mM) | 9.8±1.0 <sup>a</sup>  | 302.6±14.7                      | 3.9±1.8        | 186.0                             |
| + 1-benzyl-TIQ (0.1 mM)   | 42.5±7.5 <sup>a</sup> | 326.4±6.8                       | 1.8±0.4        | 18.0                              |

Data are shown as the mean±SEM for three different preparations, each in triplicate.

<sup>a</sup> p<0.05 compared to MPP<sup>+</sup> only.

<sup>b</sup> the K<sub>i</sub> values were estimated from the intercept on the x axis in the plot of inhibitor concentration vs. slope of the Lineweaver-Burk plot

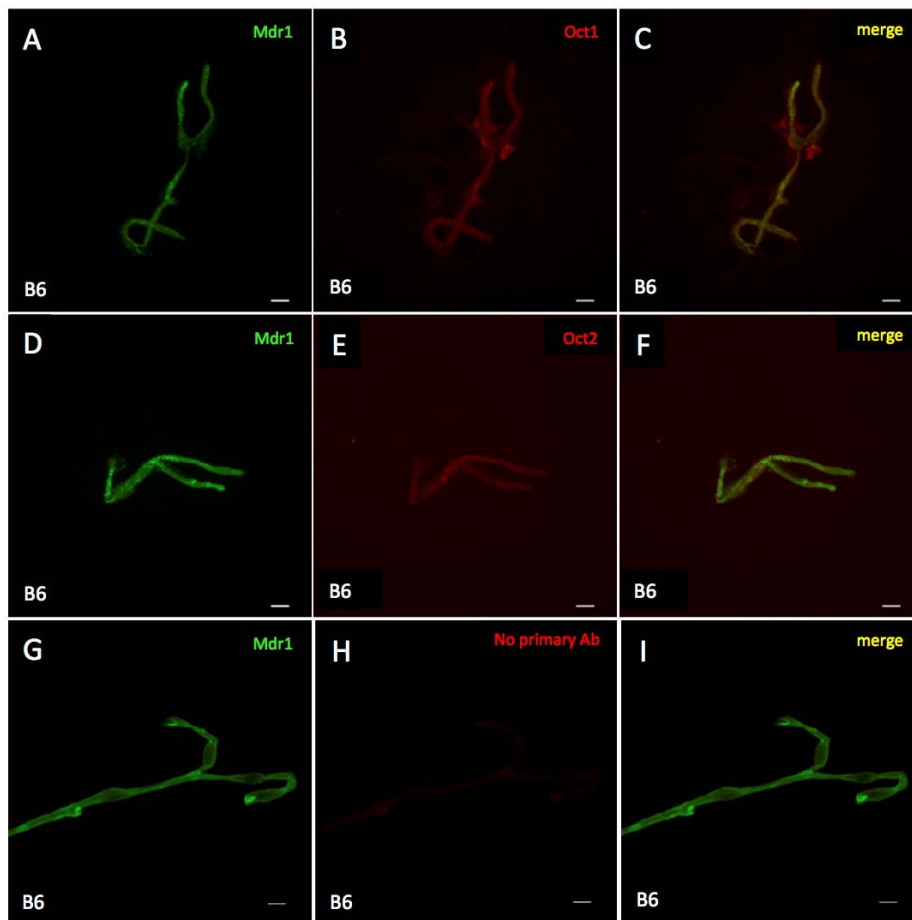

Supplementary Figure 1. Immunofluorescence staining of Mdr1 (green), Oct1 (red), and Oct2 (red) in brain microvessels isolated from B6 mice. (A-C) Protein expression of Mdr1(A), Oct1 (B) and co-localization of Mdr1 and Oct1 (C). (D-F) Protein expression of Mdr1 (D), Oct2 (E) and co-localization of Mdr1 and Oct2 (F). (G-I) Controls with primary anti-Octs antibodies omitted are also shown. Brain microvessels stained with Mdr1 (G) and secondary (anti-rabbit) antibodies without (H) or with (I) co-staining of Mdr1. Scale bars = 10  $\mu$ m.

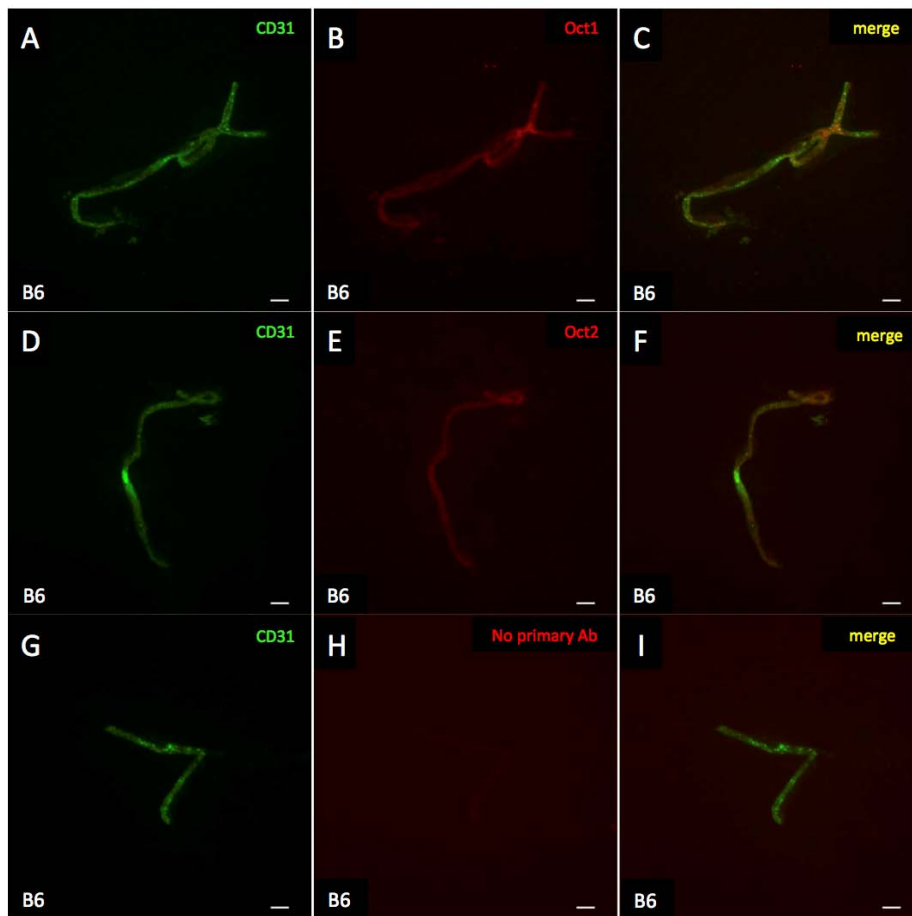

Supplementary Figure 2. Immunofluorescence staining of CD31 (green), Oct1 (red), and Oct2 (red) in brain microvessels isolated from B6 mice. (A-C) Protein expression of CD31 (A), Oct1 (B) and co-localization of CD31 and Oct1 (C). (D-F) Protein expression of CD31 (D), Oct2 (E) and co-localization of CD31 and Oct2 (F). (G-I) Controls with primary anti-Octs antibodies omitted are also shown. Brain microvessels stained with CD31 (G) and secondary (anti-rabbit) antibodies without (H) or with (I) co-staining of CD31. Scale bars = 10  $\mu$ m.

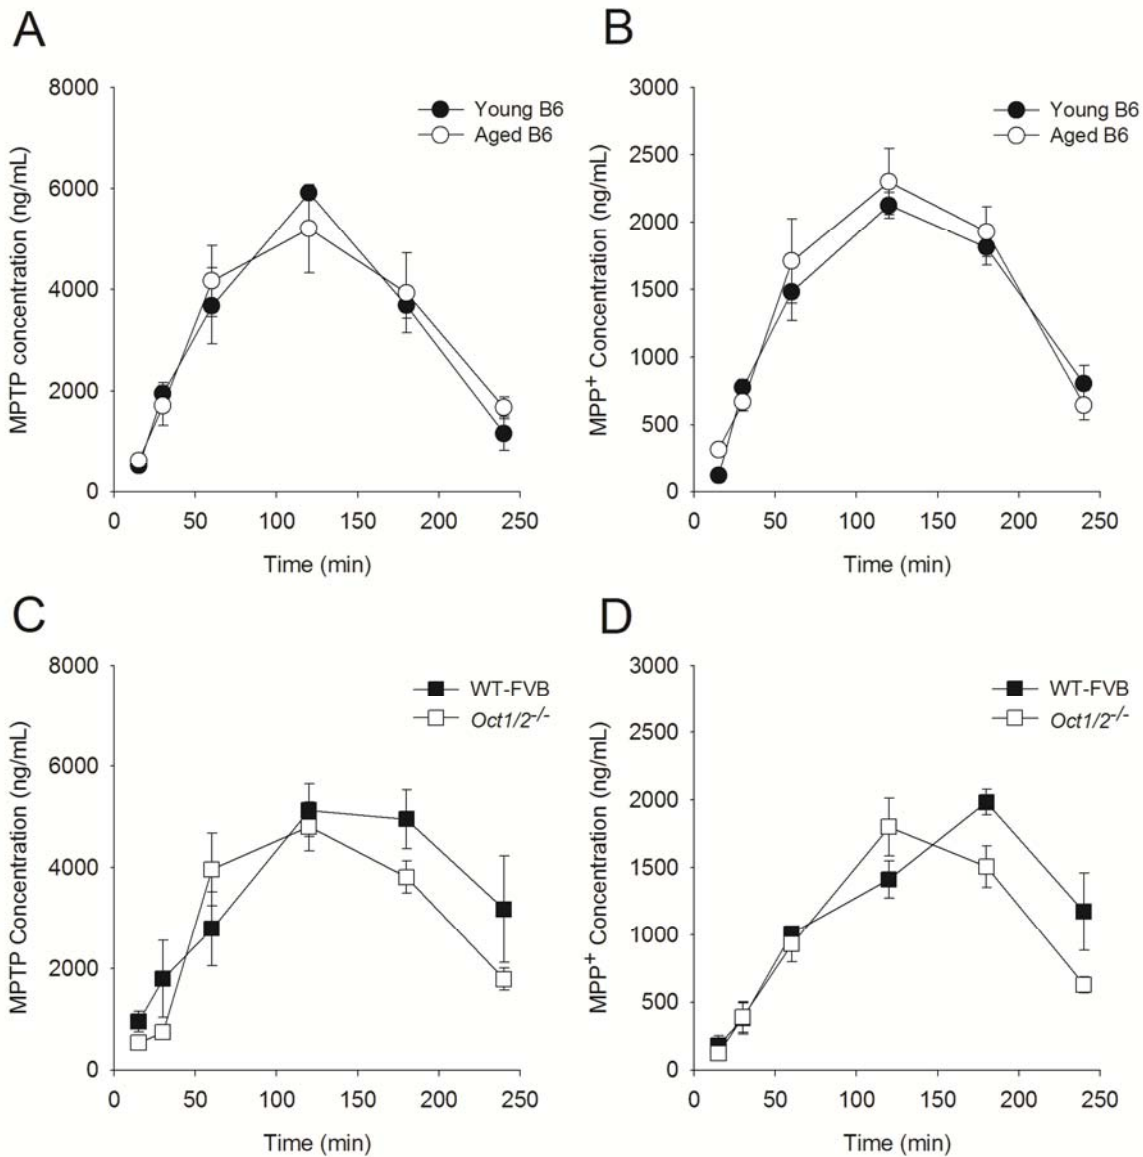

Supplementary Figure 3. Plasma concentrations of MPTP and MPP<sup>+</sup> in B6 mice, wild-type-FVB mice, and Oct1/2<sup>-/-</sup> mice after an intraperitoneal administration of 15 mg/kg MPTP. The results are shown for B6 mice at different ages (black and white circles for mice at 2 months and 15 months of age, respectively) (A and B), and for wild-type FVB mice (black squares) and Oct1/2<sup>-/-</sup> mice (white squares) at 2 months of age (C and D). The data are presented as the mean±SEM.

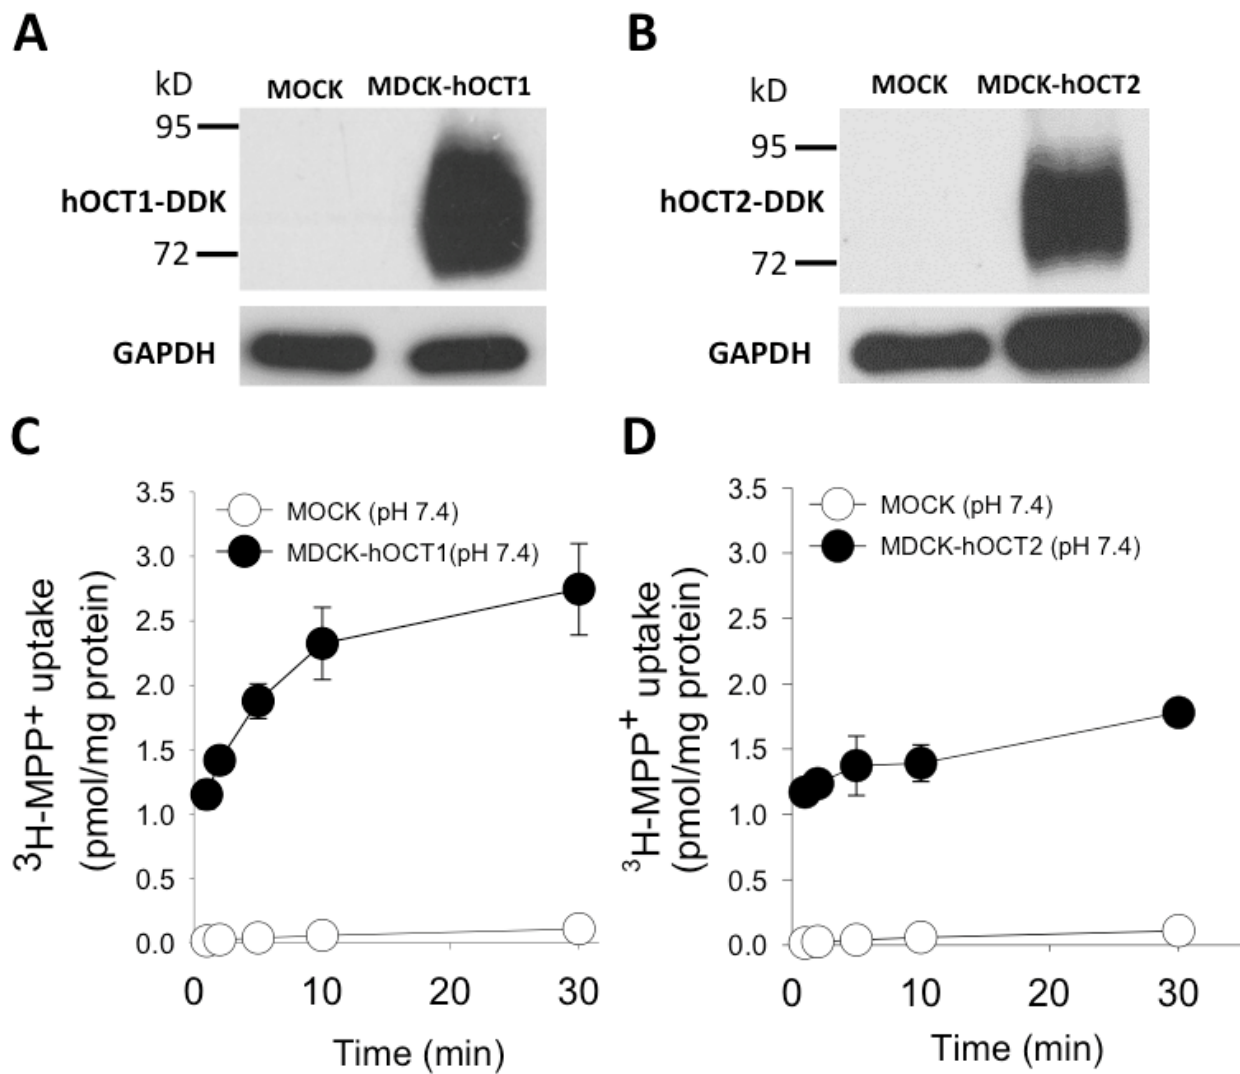

Supplementary Figure 4. (A and B) Western blots of hOCT1 and hOCT2 against the DDK-tag in the membrane fractions of MDCK-hOCT1 and MDCK-hOCT2 cells. (C and D) Time-dependent MPP<sup>+</sup> uptake by vector-transfected cells (MOCK), MDCK-hOCT1 cells (C), and MDCK-hOCT2 cells (D) at pH 7.4. The data are presented as the mean $\pm$ SEM for 3 experiments, each in triplicate.
